# Supplementary material
Source: PubMed Central journal article supplement (PMC10037202)

## Supplemental Online Content

Serrano D, Gandini S, Thomas P, et al. Efficacy of alternative dose regimens of exemestane in postmenopausal women with stage 0 to II estrogen receptor–positive breast cancer. *JAMA Oncol*. Published online March 23, 2023. doi:10.1001/jamaoncol.2023.0089

### eMethods

**eTable 1.** Participant and tumor characteristics (median, IQR) by study arm

**eTable 2.** Participant and tumor characteristics (median, IQR) by study arm and treatment adherence

**eTable 3.** Adverse Events (all grades) occurring in  $\geq 5\%$  of participants by study arm

**eTable 4.** Quality of Life: pre-treatment, post-treatment and absolute change in MenQoL mean score (SD) by study arm

**eFigure 1.** Number (%) of randomized participants by center

**eFigure 2.** Comparison in circulating estradiol suppression by study arm

**eFigure 3.** Median absolute change of Ki-67 by study arm in compliant participants (P-values for QD vs TIW = 0.3173 and QD vs QW=0.0480)

This supplemental material has been provided by the authors to give readers additional information about their work.

## eMethods

A bootstrap analysis (500 samples) was performed to generate 95% CIs around the Least Square Means (LSMEANS) of %changes of estradiol. The bootstrap normal confidence intervals were built around the observed value of the statistic with a bias correction to address the difference between the mean of the bootstrap statistic and the observed value. The bootstrap normal 95% confidence intervals of percentage changes of estradiol were built around the observed value of the statistic with a bias correction to address the difference between the mean of the bootstrap statistic and the observed value. Contrasts of percentage changes of estradiol of QD vs TIW and QD vs QW are presented. with low 97.5% limit.

All secondary biomarkers are presented as median values and interquartile ranges (IQR) at baseline and post treatment, with absolute and percentage change from pre- to post-treatment by arm and intention-to-treat. Differences by arm of absolute change were tested 2-sided p-values for superiority and evaluated through ANCOVA models adjusted for baseline values, BMI and age. ANOVA allows us to control for baseline imbalances of biomarkers and it generally has greater statistical power to detect a treatment effect than the other methods (Dickers and Altman Analysing controlled trials with baseline and follow up measurements, BMJ 2001).

For quality of life data, percentages of symptoms of each domain at baseline and after treatment were presented by trial arms. Data of the MenQoL questionnaire were summarized within each patient at each assessment time, by computing the mean score over distinct items of each domain. For descriptive purposes, such means were used to compute average scores of each domain according to time and treatment arm. Differences by arm of absolute change were evaluated through ANCOVA models adjusted for baseline values, BMI and age.

Normal distribution of residuals from full models were graphically checked.

Bar plots of % of patients with estradiol suppression, i. e. with estradiol below the detectable level, are presented by arms. For binary variables differences in frequencies among arms were evaluated with Chi-squares or Fisher Exact tests.

P-values for secondary endpoints are adjusted for multiple testing (Benjamini-Hochberg).

The statistical analyses were performed with SAS Version 9.4 (SAS Institute, Cary, NC, USA).

eTable 1. Participant and tumor characteristics (median, IQR) by study arm

|                                             | Exemestane 25 mg QD<br>(n=57) | Exemestane 25 mg TIW<br>(n=57) | Exemestane 25 mg QW<br>(n=62) |
|---------------------------------------------|-------------------------------|--------------------------------|-------------------------------|
| Age at entry, yrs                           | 66 (60 to 71)                 | 63 (60 to 69)                  | 65 (61 to 70)                 |
| BMI, kg/m <sup>2</sup>                      | 28.0 (23.9 to 32.6)           | 28.2 (24.1 to 31.8)            | 28.7 (24.1 to 33.8)           |
| BMI category (normal, overweight, obese), % | 32/35/33                      | 28/42/30                       | 29/34/36                      |
| Waist/Hip ratio                             | 0.87 (0.84 to 0.92)           | 0.89 (0.83 to 0.94)            | 0.88 (0.84 to 0.91)           |
| Smoking (never, ever, unknown)              | 36/20/1                       | 36/20/1                        | 42/20/0                       |
| Alcohol use (never, ever, unknown)          | 26/30/1                       | 23/34/0                        | 23/38/1                       |
| Histotype (invasive, in-situ; n)            | 54/3                          | 48/9                           | 58/4                          |
| ER (%) <sup>§</sup>                         | 99 (95 to 99)                 | 99 (97 to 99)                  | 99 (95 to 99)                 |
| PgR (%) <sup>§</sup>                        | 65 (10 to 95)                 | 70 (10 to 99)                  | 70 (8 to 95)                  |
| Ki-67 (%) <sup>§</sup>                      | 13 (7 to 17)                  | 13 (7 to 20)                   | 12 (6 to 19)                  |
| Her2 overexpression, n <sup>§</sup>         | 1                             | 5                              | 1                             |

<sup>§</sup> centralized evaluation

QD: once a day; TIW; three times a week, QW: once a week

eTable 2. Participant and tumor characteristics (median, IQR) by study arm and treatment adherence

|                                             | Compliant                     |                                |                               | Non-compliant                    |                               |                                 |
|---------------------------------------------|-------------------------------|--------------------------------|-------------------------------|----------------------------------|-------------------------------|---------------------------------|
|                                             | Exemestane 25 mg QD<br>(n=47) | Exemestane 25 mg<br>TIW (n=52) | Exemestane 25 mg QW<br>(n=54) | Exemestane 25 mg<br>QD<br>(n=10) | Exemestane 25 mg<br>TIW (n=5) | Exemestane 25 mg<br>QW<br>(n=8) |
| Age at entry, yrs                           | 66 (59 to 71)                 | 64 (60 to 70)                  | 65 (61 to 70)                 | 70 (61 to 79)                    | 63 (63 to 66)                 | 66 (61 to 70)                   |
| BMI, kg/m <sup>2</sup>                      | 27.7 (23.9 to 32.8)           | 28.2 (24.1 to 31.5)            | 28.7 (24.1 to 33.0)           | 28.1 (23.4 to 32.5)              | 27.8 (24.4 to 30.4)           | 32.3 (22.5 to 43.0)             |
| BMI category (normal, overweight, obese), % | 33/30/37                      | 29/33/38                       | 32/41/27                      | 29/43/28                         | 33/0/67                       | 43/29/28                        |
| Waist/Hip ratio                             | 0.87 (0.85 to 0.92)           | 0.88 (0.84 to 0.94)            | 0.88 (0.85 to 0.92)           | 0.8 (0.83 to 0.92)               | 0.89 (0.85 to 0.91)           | 0.88 (0.88 to 0.89)             |
| Smoking (never, ever, unknown)              | 30/16/1                       | 31/20/1                        | 37/17/0                       | 6/4/0                            | 5/0/0                         | 5/3/0                           |
| Alcohol use (never, ever, unknown)          | 22/24/1                       | 23/29/0                        | 22/31/1                       | 0/6/4                            | 0/5/0                         | 0/6/2                           |

eTable 3. Adverse Events (all grades) occurring in  $\geq 5\%$  of participants by study arm

| <b>Body System</b>                                   | <b>CodeTerm*</b>                     | <b>QD<br/>(n=57)</b> | <b>TIW<br/>(n=57)</b> | <b>QW<br/>(n=62)</b> |
|------------------------------------------------------|--------------------------------------|----------------------|-----------------------|----------------------|
| Gastrointestinal disorders                           | Diarrhea                             | 5 (8.8%)             | 1 (1.8%)              | 2 (3.2%)             |
|                                                      | Dry mouth                            | 1 (1.8%)             | 3 (5.3%)              | 0 (0%)               |
|                                                      | Dyspepsia                            | 2 (3.5%)             | 3 (5.3%)              | 2 (3.2%)             |
|                                                      | Nausea                               | 8 (14.0%)            | 11 (19.3%)            | 1 (1.6%)             |
| General disorders and administration site conditions | Fatigue                              | 3 (5.3%)             | 7 (12.3%)             | 3 (4.8%)             |
|                                                      | Irritability                         | 1 (1.8%)             | 5 (8.8%)              | 0 (0%)               |
| Infections and infestations                          | Upper respiratory tract infection    | 3 (5.3%)             | 0 (0%)                | 1 (1.6%)             |
|                                                      | Urinary tract infection              | 1 (1.8%)             | 3 (5.3%)              | 0 (0%)               |
| Investigations                                       | Alanine aminotransferase increased   | 4 (7.0%)             | 1 (1.8%)              | 2 (3.2%)             |
|                                                      | Aspartate aminotransferase increased | 3 (5.3%)             | 1 (1.8%)              | 2 (3.2%)             |
|                                                      | Gamma-glutamyltransferase increased  | 3 (5.3%)             | 2 (3.5%)              | 0 (0%)               |
| Musculoskeletal and connective tissue disorders      | Arthralgia                           | 7 (12.3%)            | 2 (3.5%)              | 7 (11.3%)            |
|                                                      | Muscular weakness                    | 0 (0%)               | 3 (5.3%)              | 0 (0%)               |

|                                                 |                   |            |            |            |
|-------------------------------------------------|-------------------|------------|------------|------------|
|                                                 | Pain in extremity | 1 (1.8%)   | 2 (3.5%)   | 4 (6.5%)   |
| Nervous system disorders                        | Dizziness         | 2 (3.5%)   | 3 (5.3%)   | 1 (1.6%)   |
|                                                 | Headache          | 6 (10.5%)  | 8 (14.0%)  | 4 (6.5%)   |
| Psychiatric disorders                           | Anxiety           | 3 (5.3%)   | 0 (0%)     | 3 (4.8%)   |
|                                                 | Insomnia          | 3 (5.3%)   | 6 (10.5%)  | 7 (11.3%)  |
| Reproductive system and breast disorders        | Breast pain       | 2 (3.5%)   | 1 (1.8%)   | 4 (6.5%)   |
| Respiratory, thoracic and mediastinal disorders | Cough             | 4 (7.0%)   | 0 (0%)     | 0 (0%)     |
| Skin and subcutaneous tissue disorders          | Dry skin          | 0 (0%)     | 1 (1.8%)   | 4 (6.5%)   |
|                                                 | Pruritus          | 1 (1.8%)   | 5 (8.8%)   | 1 (1.6%)   |
| Vascular disorders                              | Hot flashes       | 12 (21.1%) | 11 (19.3%) | 16 (25.8%) |

No statistically significant differences were found after adjusting for multiple testing

\*As classified from CTCAE version 4.0.3

QD: 25 mg once a day; TIW: 25 mg three times a week, QW: 25 mg once a week

eTable 4. Quality of Life: pre-treatment, post-treatment and absolute change in MenQoL mean score (SD) by study arm

| Domain            | Exe 25 mg QD<br>(n=48) |            |                    | Exe 25 mg TIW<br>(n=54) |           |                    | Exe 25 mg QW<br>(n=57) |           |                    | P<br>QD vs<br>TIW<br>Adjusted* | P<br>QD vs<br>QW<br>Adjusted* |
|-------------------|------------------------|------------|--------------------|-------------------------|-----------|--------------------|------------------------|-----------|--------------------|--------------------------------|-------------------------------|
|                   | Pre                    | Post       | Absolute<br>change | Pre                     | Post      | Absolute<br>change | Pre                    | Post      | Absolute<br>change |                                |                               |
| Vasomotor         | 2.2 (1.5)              | 2.5 (1.7)  | 0.41 (1.2)         | 2.5 (1.9)               | 2.8 (1.9) | 0.28 (1.4)         | 2.6 (1.9)              | 3.2 (2.1) | 0.51 (1.5)         | 0.7349                         | 0.7575                        |
| Psycho-<br>social | 2.5 (1.3)              | 2.3 (1.3)  | -0.19 (0.98)       | 2.3 (1.2)               | 2.3 (1.4) | 0.06 (1.2)         | 2.6 (1.5)              | 2.6 (1.6) | -0.06 (1.1)        | 0.4350                         | 0.7436                        |
| Physical          | 2.5 (1.1)              | 2.2 (0.95) | -0.37 (0.77)       | 2.3 (0.9)               | 2.3 (1.2) | 0.07 (0.86)        | 2.6 (1.4)              | 2.6 (1.4) | -0.09 (0.67)       | 0.0591                         | 0.0524                        |
| Sexual            | 2.0 (1.4)              | 1.5 (0.99) | -0.45 (1.0)        | 1.9 (1.5)               | 1.8 (1.3) | -0.20 (1.7)        | 2.2 (1.8)              | 1.7 (1.1) | -0.52 (1.7)        | 0.4317                         | 0.9000                        |
| Mean              | 2.3 (0.93)             | 2. (0.82)  | -0.15 (0.58)       | 2.2 (1.0)               | 2.3 (1.0) | 0.05 (0.79)        | 2.5 (1.1)              | 2.5 (1.0) | -0.06 (0.71)       | 0.3078                         | 0.4574                        |

\*Adjusted for baseline, age and BMI and multiple testing; QD: once a day; TIW: three times a week, QW: once a week

MenQoL item is scored from 1 to 8: 1, no symptom, 2, presence of the symptoms but not bothersome, 3-8, an increasing grade of discomfort.



eFigure 1. Number (%) of randomized participants by center

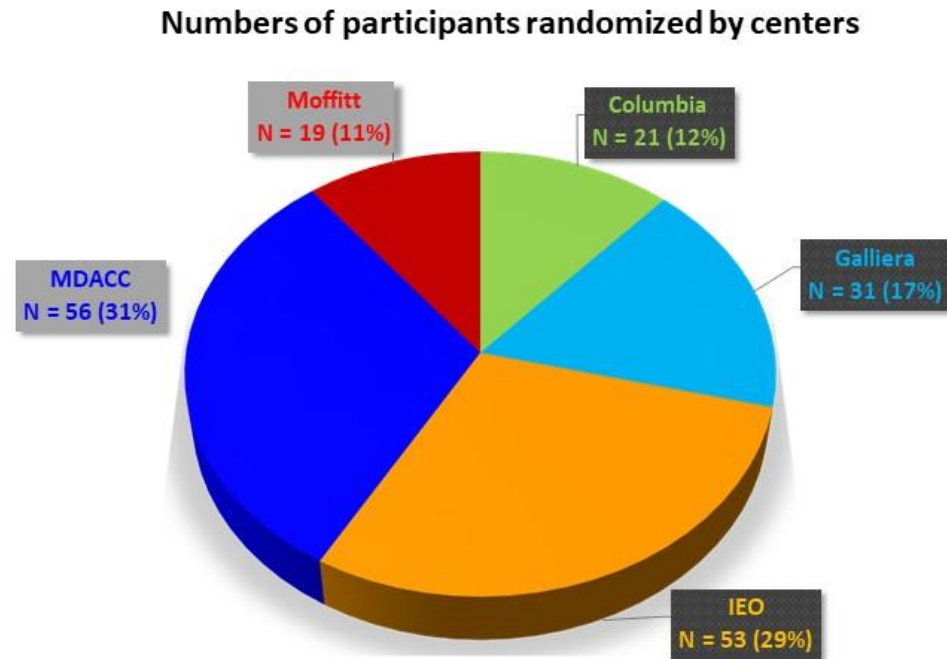

Columbia University Irving Medical Center, New York, NY, USA;

European Institute of Oncology IRCCS (IEO), Milan, Italy;

MD Anderson Cancer Center, Houston (MDACC), TX, USA;

Moffitt Cancer Center, Tampa, FL, USA;

Ospedali Galliera, Genoa, Italy;

eFigure 2. Comparison in circulating estradiol suppression by study arm

Panel A. Percentage of participants with total estradiol suppression using SPE method, by study arm (P-value for QD vs TIW= 0.7822 and for QD vs QW= 0.0040). Panel B, Percentage of participants with total estradiol suppression using LLE method, by study arm (P-value for QD vs TIW= 0.0133 and for QD vs QW= 0.0040)

### Percentage of participants with estradiol suppression in each exemestane arm

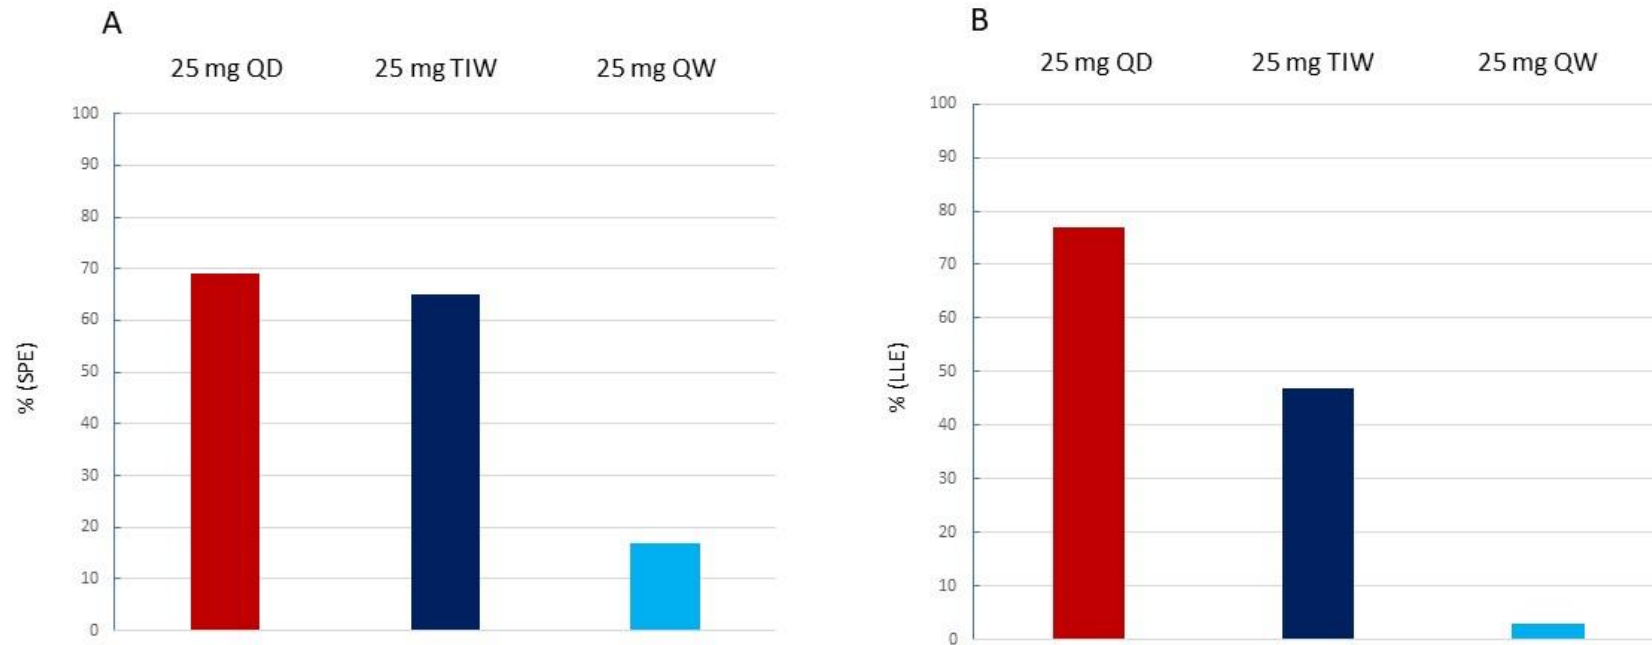

eFigure 3. Median absolute change of Ki-67 by study arm in compliant participants (P-values for QD vs TIW = 0.3173 and QD vs QW=0.0480)

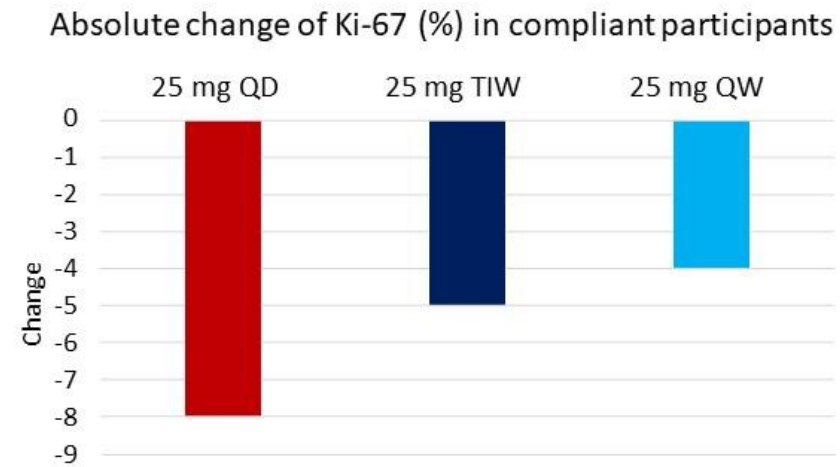

Supplement: jamaoncol-e230089-s001.pdf [file jamaoncol-e230089-s001.pdf]
