# Supplementary material
Source: PubMed Central journal article supplement (PMC10037202)
Supplement: jamaoncol-e230089-s003.pdf [file jamaoncol-e230089-s003.pdf]

## Data Sharing Statement

Serrano. Efficacy of Alternative Dose Regimens of Exemestane in Postmenopausal Women With Stage 0 to II Estrogen Receptor-Positive Breast Cancer. *JAMA Oncol*. Published March 23, 2023. doi:10.1001/jamaoncol.2023.0089

### Data

**Data available:** Yes

**Data types:** Deidentified participant data

**How to access data:** The data underlying this article will be shared on reasonable request to the NCI at the following website: <https://cdas.cancer.gov/learn/eppt/browse/>

**When available:** With publication

### Supporting Documents

**Document types:** None

### Additional Information

**Who can access the data:** Data will be available to the research community upon reasonable request via the CDAS website, <https://cdas.cancer.gov/learn/eppt/browse/>

**Types of analyses:** for a specified purpose

**Mechanisms of data availability:** The request will be evaluated by the NCI
